# Supplementary material for: 1-Ethyl-2,3-dimethylimidazolium paramagnetic ionic liquids with 3D magnetic ordering in its solid state: synthesis, structure and magneto-structural correlations
Source: Royal Society of Chemistry journal article supplement (doi:10.1039/c5ra05723j), 2015-01-01
Supplement: c5ra05723j1.pdf [file c5ra05723j1.pdf]

**Table S1.** Final refined positional coordinates from synchrotron powder X Ray diffraction pattern of Edimim[FeCl<sub>4</sub>] at 100 K.

| Edimim[FeCl <sub>4</sub> ] at 100K |            |            |            |
|------------------------------------|------------|------------|------------|
| Atom                               | <i>x/a</i> | <i>y/b</i> | <i>z/c</i> |
| Fe                                 | 0.5300(2)  | 1.7467(2)  | 1.2536(4)  |
| Cl1                                | 0.4423(3)  | 1.7756(3)  | 1.4559(4)  |
| Cl2                                | 0.3625(3)  | 1.7637(3)  | 1.0826(4)  |
| Cl3                                | 0.7005(4)  | 1.8427(3)  | 1.2174(4)  |
| Cl4                                | 0.6017(4)  | 1.6007(2)  | 1.2449(4)  |
| C1''                               | 0.0713(11) | 0.8728(7)  | 1.3526(4)  |
| H1A''                              | 0.0102     | 0.8231     | 1.2918     |
| H1B''                              | 0.0047     | 0.9155     | 1.4102     |
| H1C''                              | 0.1432     | 0.837      | 1.4238     |
| C1'                                | 0.3789(10) | 1.1206(7)  | 1.1917(4)  |
| H1A'                               | 0.3666     | 1.1675     | 1.2769     |
| H1B'                               | 0.3614     | 1.1545     | 1.0923     |
| C2'                                | 0.5220(11) | 1.0850(7)  | 1.1970(4)  |
| H2A'                               | 0.5431     | 1.0507     | 1.2955     |
| H2B'                               | 0.592      | 1.1423     | 1.1893     |
| H2C'                               | 0.5352     | 1.0369     | 1.1138     |
| C1'''                              | 0.2771(11) | 1.0208(8)  | 1.4519(4)  |
| H1A'''                             | 0.3459     | 1.0794     | 1.4568     |
| H1B'''                             | 0.3303     | 0.9612     | 1.4962     |
| H1C'''                             | 0.1893     | 1.0359     | 1.5097     |
| C2                                 | 0.2343(11) | 1.0012(8)  | 1.3040(4)  |
| N3                                 | 0.1463(9)  | 0.9324(7)  | 1.2623(4)  |
| N1                                 | 0.2778(9)  | 1.0443(7)  | 1.1936(4)  |
| C5                                 | 0.2095(11) | 1.0065(8)  | 1.0721(4)  |
| H5                                 | 0.2187     | 1.0261     | 0.9695     |
| C4                                 | 0.1287(11) | 0.9365(7)  | 1.1165(4)  |
| H4                                 | 0.0632     | 0.8956     | 1.0525     |

Full occupancies for all atoms.

*a* = 9.6703(1) Å, *b* = 14.3513(2) Å, *c* = 9.5744(1) Å,  $\alpha = \gamma = 90^\circ$ ,  $\beta = 94.261(1)^\circ$ , s.g. *P*2<sub>1</sub>/*n*, *B*<sub>Fe</sub> = 2.5(2) Å<sup>2</sup>, *B*<sub>Cl</sub> = 2.9(1) Å<sup>2</sup>, *B*<sub>Edimim</sub> = 3.2(2) Å<sup>2</sup>

**Table S2.** Final refined positional coordinates obtained from X Ray single crystal diffraction of Edimim[FeBr<sub>4</sub>] at 100 K.

| Edimim[FeBr <sub>4</sub> ] at 100K |            |             |            |
|------------------------------------|------------|-------------|------------|
| Atom                               | <i>x/a</i> | <i>y/b</i>  | <i>z/c</i> |
| Fe                                 | 0.2999(3)  | 0.73410(14) | 0.7427(3)  |
| Br1                                | 0.4534(2)  | 0.62359(11) | 0.5637(3)  |
| Br2                                | 0.4247(2)  | 0.73187(12) | 1.0494(2)  |
| Br3                                | 0.3449(2)  | 0.87866(10) | 0.6117(2)  |
| Br4                                | -0.0321(2) | 0.70335(11) | 0.7492(2)  |
| C1''                               | 1.088(3) - | 1.1013(15)  | 0.263(3)   |
| H1A''                              | 0.9990     | 1.1233      | -0.3584    |
| H1B''                              | 1.2036     | 1.0768      | -0.3211    |
| H1C''                              | 1.1248     | 1.1512      | -0.1806    |
| C1'                                | 0.948(2)   | 0.8567(10)  | 0.200(2)   |
| H1A'                               | 1.0849     | 0.8491      | 0.2369     |
| H1B'                               | 0.8960     | 0.7971      | 0.1629     |
| C2'                                | 0.836(3)   | 0.8954(19)  | 0.354(3)   |
| H2A'                               | 0.8430     | 0.8546      | 0.4606     |
| H2B'                               | 0.7019     | 0.9028      | 0.3146     |
| H2C'                               | 0.8899     | 0.9543      | 0.3885     |
| C1'''                              | 1.260(4)   | 1.003(2)    | 0.086(5)   |
| H1A'''                             | 1.2890     | 0.9614      | 0.1889     |
| H1B'''                             | 1.2572     | 1.0649      | 0.1320     |
| H1C'''                             | 1.3599     | 0.9970      | -0.0078    |
| C2                                 | 1.063(3)   | 0.9783(19)  | 0.000(4)   |
| N3                                 | 0.991(4)   | 1.0267(17)  | -0.150(4)  |
| N1                                 | 0.930(3)   | 0.9221(14)  | 0.045(3)   |
| C5                                 | 0.789(4)   | 0.9298(19)  | -0.078(5)  |
| H5                                 | 0.6857     | 0.8882      | -0.0849    |
| C4                                 | 0.804(4)   | -1.000(2)   | 0.190(5)   |
| H4                                 | 0.7119     | 1.0249      | -0.2740    |

Full occupancies for all atoms.

*a* = 6.957(6) Å, *b* = 14.804(12) Å, *c* = 7.232(6) Å,  $\alpha = \gamma = 90^\circ$ ,  $\beta = 90.728(14)^\circ$ , s.g. P2<sub>1</sub>,

**Table S3.** Anisotropic displacement parameters ( $\text{\AA}^2 \times 10^3$ ) for Edimim[FeBr<sub>4</sub>]. The anisotropic displacement factor exponent takes the form:  $-2\pi^2 [h^2 a^2 U_{11} + \dots + 2 h k a^* b^* U_{12}]$ .  $U(\text{eq})$  is defined as one third of the trace of the orthogonalized  $U_{ij}$  tensor.

|       | $U_{11}$ | $U_{22}$ | $U_{33}$ | $U_{23}$ | $U_{13}$ | $U_{12}$ |
|-------|----------|----------|----------|----------|----------|----------|
| Br(1) | 26(1)    | 43(1)    | 47(1)    | 0(1)     | 7(1)     | -8(1)    |
| Br(2) | 36(1)    | 42(1)    | 33(1)    | 4(1)     | 0(1)     | 3(1)     |
| Br(3) | 33(1)    | 30(1)    | 39(1)    | 6(1)     | 5(1)     | -6(1)    |
| Br(4) | 38(1)    | 38(1)    | 48(1)    | -11(1)   | 6(1)     | 11(1)    |
| Fe(1) | 26(1)    | 24(1)    | 32(1)    | 2(1)     | 4(1)     | 1(1)     |
| C(1A) | 49(10)   | 82(16)   | 30(12)   | 12(10)   | 5(9)     | -7(10)   |
| C(5A) | 27(7)    | 33(9)    | 25(9)    | 5(7)     | 10(6)    | -2(6)    |
| C(6A) | 43(10)   | 130(20)  | 62(17)   | 52(15)   | 26(9)    | 44(12)   |
| C(3A) | 32(13)   | 49(18)   | 42(19)   | -20(16)  | -8(13)   | 26(12)   |
| C(2A) | 31(8)    | 29(9)    | 28(11)   | 1(7)     | 2(8)     | 15(8)    |
| N(1A) | 45(9)    | 37(8)    | 28(10)   | -1(7)    | -12(8)   | 16(9)    |
| N(2A) | 25(8)    | 20(7)    | 37(10)   | 4(7)     | -4(8)    | 5(7)     |
| C(4A) | 33(9)    | 32(10)   | 23(11)   | -1(9)    | -11(8)   | 3(8)     |
| C(7A) | 40(9)    | 35(10)   | 23(10)   | -6(8)    | -7(8)    | 8(8)     |
| C(1B) | 49(10)   | 82(16)   | 30(12)   | 12(10)   | 5(9)     | -7(10)   |
| C(5B) | 27(7)    | 33(9)    | 25(9)    | 5(7)     | 10(6)    | -2(6)    |
| C(6B) | 43(10)   | 130(20)  | 62(17)   | 52(15)   | 26(9)    | 44(12)   |
| C(3B) | 32(13)   | 49(18)   | 42(19)   | -20(16)  | -8(13)   | 26(12)   |
| C(2B) | 31(8)    | 29(9)    | 28(11)   | 1(7)     | 2(8)     | 15(8)    |
| N(1B) | 45(9)    | 37(8)    | 28(10)   | -1(7)    | -12(8)   | 16(9)    |
| N(2B) | 25(8)    | 20(7)    | 37(10)   | 4(7)     | -4(8)    | 5(7)     |
| C(4B) | 33(9)    | 32(10)   | 23(11)   | -1(9)    | -11(8)   | 3(8)     |
| C(7B) | 40(9)    | 35(10)   | 23(10)   | -6(8)    | -7(8)    | 8(8)     |
